# Supplementary material for: Association Between Birth Weight and Risk of Pregnancy-Induced Hypertension and Gestational Diabetes in Japanese Women: JPHC-NEXT Study
Source: PubMed Central journal article supplement (PMC8918619; doi:10.2188/jea.je20200302), 2022-04-05
Supplement: je-32-168-s001.pdf [file je-32-168-s001.pdf]

|                                           |            |            |              |              |               |               |               |               |            |            |
|-------------------------------------------|------------|------------|--------------|--------------|---------------|---------------|---------------|---------------|------------|------------|
| No                                        | 258 (85.7) | 424 (89.6) | 3,855 (87.3) | 5,902 (89.6) | 20,433 (88.4) | 28,264 (89.6) | 10,875 (82.6) | 13,724 (83.9) | 225 (79.8) | 283 (79.9) |
| Yes                                       | 43 (14.3)  | 49 (10.4)  | 563 (12.7)   | 688 (10.4)   | 2,680 (11.6)  | 3,269 (10.4)  | 2,296 (17.4)  | 2,629 (16.1)  | 57 (20.2)  | 71 (20.1)  |
| <b>Educational attainment<sup>d</sup></b> |            |            |              |              |               |               |               |               |            |            |
| Junior high school                        | 87 (28.9)  | 182 (38.5) | 866 (19.6)   | 1,911 (29.0) | 3,864 (16.7)  | 7,182 (22.8)  | 962 (7.3)     | 1,858 (11.4)  | 21 (7.4)   | 36 (10.3)  |
| High school                               | 145 (48.2) | 211 (44.5) | 2,340 (53.0) | 3,241 (49.2) | 12,493 (54.1) | 16,343 (51.8) | 6,846 (52.0)  | 8,443 (51.6)  | 127 (45.0) | 164 (46.2) |
| Other                                     | 56 (18.6)  | 67 (14.2)  | 1,026 (23.2) | 1,235 (18.7) | 5,638 (24.4)  | 6,768 (21.5)  | 4,291 (32.6)  | 4,905 (30.0)  | 103 (36.5) | 121 (34.3) |
| University or more                        | 13 (4.3)   | 13 (2.8)   | 186 (4.2)    | 204 (3.1)    | 1,118 (4.8)   | 1,240 (3.9)   | 1,072 (8.1)   | 1,147 (7.0)   | 31 (11.0)  | 33 (9.2)   |

<sup>a</sup> “Fully imputed”: based on the dataset of all women who gave birth with all missing variables imputed;

<sup>b</sup> “Partially imputed”: based on the dataset of all women who gave birth and had self-reported birthweight, and with all missing variables except for birthweight imputed;

<sup>c</sup> Smoking status at first pregnancy, “No” combines “Never smoke or starting after the 1st pregnancy”;

<sup>d</sup> Educational attainment, “Other” means “Junior college / specialty / 4 year system dropout”

**eTable 2.** Odds ratio for each outcome based on complete cases dataset (N=41,285)

|                                                   | <b>Birth weight</b> |                            |                             |                             |                     |
|---------------------------------------------------|---------------------|----------------------------|-----------------------------|-----------------------------|---------------------|
|                                                   | <1,500 g<br>(n=301) | 1,500–2,499 g<br>(n=4,418) | 2,500–2,999 g<br>(n=23,113) | 3,000–3,999 g<br>(n=13,171) | >4,000 g<br>(n=282) |
| <b>Pregnancy induced hypertension</b>             |                     |                            |                             |                             |                     |
| n(%)                                              | 42 (14.0)           | 411 (9.3)                  | 2,025 (8.8)                 | 1,018 (7.7)                 | 27 (9.6)            |
| Odds ratio [95% confidence interval] <sup>a</sup> |                     |                            |                             |                             |                     |
| Model 1                                           | 1.82 [1.30;2.54]    | 1.16 [1.03;1.31]           | 1.10 [1.02;1.20]            | reference                   | 1.32 [0.88;1.97]    |
| Model 2                                           | 1.81 [1.30;2.54]    | 1.14 [1.01;1.29]           | 1.09 [1.01;1.19]            | reference                   | 1.34 [0.89;2.01]    |
| Model 3a                                          | 1.79 [1.28;2.51]    | 1.14 [1.00;1.29]           | 1.09 [1.01;1.19]            | reference                   | 1.34 [0.90;2.01]    |
| Model 3b                                          | 1.85 [1.32;2.59]    | 1.17 [1.03;1.32]           | 1.11 [1.03;1.21]            | reference                   | 1.33 [0.88;1.99]    |
| <b>Gestational diabetes mellitus</b>              |                     |                            |                             |                             |                     |
| n(%)                                              | 8 (2.7)             | 189 (4.3)                  | 830 (3.6)                   | 617 (4.7)                   | 19 (6.7)            |
| Odds ratio [95% confidence interval] <sup>a</sup> |                     |                            |                             |                             |                     |
| Model 1                                           | 0.75 [0.37;1.52]    | 1.20 [1.01;1.42]           | 0.98 [0.88;1.10]            | reference                   | 1.22 [0.75;1.96]    |
| Model 2                                           | 0.75 [0.37;1.52]    | 1.20 [1.01;1.43]           | 1.00 [0.89;1.12]            | reference                   | 1.16 [0.72;1.87]    |
| Model 3a                                          | 0.73 [0.36;1.49]    | 1.20 [1.01;1.43]           | 1.01 [0.90;1.13]            | reference                   | 1.15 [0.71;1.85]    |
| Model 3b                                          | 0.75 [0.37;1.53]    | 1.22 [1.03;1.46]           | 1.03 [0.92;1.15]            | reference                   | 1.14 [0.70;1.84]    |

<sup>a</sup> Multilevel logistic regression model with place of residence as random effect

Model 1: birth year

Model 2: + (education) + (family history) + (passive smoking at 10 years old) + (height) + (older sibling)

Model 3a: + (age at first pregnancy) + (age at first pregnancy) x (birth year) + (smoking status)

Model 3b: + (BMI at 20 years old)

**eTable 3.** Odds ratio for each outcome based on the dataset which impute all variables (N=55,303)

|                                                   | <b>Birth weight</b> |                            |                             |                             |                     |
|---------------------------------------------------|---------------------|----------------------------|-----------------------------|-----------------------------|---------------------|
|                                                   | <1,500g<br>(n=491)  | 1,500–2,499 g<br>(n=6,613) | 2,500–2,999 g<br>(n=31,462) | 3,000–3,999 g<br>(n=16,389) | >4,000 g<br>(n=348) |
| <b>Pregnancy induced hypertension</b>             |                     |                            |                             |                             |                     |
| n (%)                                             | 58 (11.9)           | 627 (9.5)                  | 2841 (9.0)                  | 1305 (8.0)                  | 36 (10.2)           |
| Odds ratio [95% confidence interval] <sup>a</sup> |                     |                            |                             |                             |                     |
| Model 1                                           | 1.45 [1.07;1.98]    | 1.15 [1.03;1.29]           | 1.11 [1.02;1.20]            | reference                   | 1.36 [0.95;1.94]    |
| Model 2                                           | 1.45 [1.06;1.97]    | 1.14 [1.01;1.27]           | 1.09 [1.01;1.19]            | reference                   | 1.36 [0.95;1.96]    |
| Model 3a                                          | 1.44 [1.05;1.97]    | 1.13 [1.01;1.27]           | 1.10 [1.01;1.19]            | reference                   | 1.37 [0.96;1.96]    |
| Model 3b                                          | 1.56 [1.14;2.14]    | 1.16 [1.03;1.30]           | 1.12 [1.03;1.22]            | reference                   | 1.37 [0.94;1.99]    |
| <b>Gestational diabetes mellitus</b>              |                     |                            |                             |                             |                     |
| n(%)                                              | 13 (2.8)            | 246 (3.7)                  | 1068 (3.4)                  | 723 (4.4)                   | 24 (6.8)            |
| Odds ratio [95% confidence interval] <sup>a</sup> |                     |                            |                             |                             |                     |
| Model 1                                           | 0.84 [0.46;1.57]    | 1.15 [0.98;1.36]           | 1.00 [0.90;1.11]            | reference                   | 1.34 [0.87;2.05]    |
| Model 2                                           | 0.85 [0.46;1.59]    | 1.15 [0.97;1.37]           | 1.01 [0.91;1.13]            | reference                   | 1.29 [0.84;1.98]    |
| Model 3a                                          | 0.85 [0.46;1.58]    | 1.15 [0.98;1.36]           | 1.03 [0.92;1.14]            | reference                   | 1.27 [0.82;1.96]    |
| Model 3b                                          | 0.87 [0.47;1.61]    | 1.19 [1.01;1.41]           | 1.04 [0.93;1.16]            | reference                   | 1.22 [0.78;1.93]    |

<sup>a</sup> Multilevel logistic regression model with place of residence as random effect

Model 1: birth year

Model 2: + (education) + (family history) + (passive smoking at 10 years old) + (height) + (older sibling)

Model 3a: + (age at first pregnancy) + (age at first pregnancy) x (birth year) + (smoking status)

Model 3b: + (BMI at 20 years old)
